# Supplementary material
Source: PubMed Central journal article supplement (PMC3801014)
Supplement: 1313001110_pnas.201313001SI.pdf [file 1313001110_pnas.201313001SI.pdf]

# Supporting Information

Perera et al. 10.1073/pnas.1313001110

## SI Materials and Methods

**Generation of Bone Marrow Chimeras.** Rag<sup>-/-</sup> mice were sublethally irradiated (730 rads) and reconstituted by i.v. injection of d17 fetal liver cells ( $4 \times 10^5$  cells) or adult bone marrow cells ( $1 \times 10^6$  cells) from B6 CD45.1 mice that had both been depleted of Gr1<sup>+</sup> cells by AutoMACS. Chimeras were analyzed after 2 mo by gating on CD45.1<sup>+</sup> cells.

**Parabiotic Mice.** Parabiosis surgery were performed as described in ref. 1.

**Antibodies and Flow Cytometry.** Monoclonal antibodies for flow cytometry against mouse B220 (RA3-6B2), CD19 (ebio1D3), Igk (187.1), MHC class II (M5/114.15.2), CD43 (S7), CD45.2 (104), CD45.1 (A20), CD69 (H1.2F3), CD86 (GL1), ICOSL (HK5.3), IgM (11/41), IgD (11-26), CD93 (AA4.1), CD21 (ebio4E3), CD24/HSA (M1/69), CD23 (B3B4), CD5 (53-7.3), CD4 (RM4-5), CD8 (53.6.7), CD90.2 (53-2.1), CD11c (N418), and MHC II A<sup>g7</sup> (10-2.16) were purchased from eBioscience, BD Biosciences, or Biolegend, or provided by the Fitch Monoclonal Antibody Facility (University of Chicago). Samples were collected on

a FACS Canto (BD), and data were analyzed using FlowJo (Tree Star).

**Generation of Clonotypic Antibodies for 121 Heavy and Light Chain.** The 6.121 mouse IgG1 monoclonal antibody was purified from 6.121 hybridoma cells and was used as immunogen. Lewis rats were hyperimmunized intraperitoneally following the protocol of Hayakawa (2). Three days after the final boost, spleen cells were fused with SP2/mIL-6 cells. Clonotypic specificity was screened by comparing reactivity to 6.121 and control 6.149 IgG by ELISA, and by staining B cells of 121 knockin and control mice. Fine specificity was then examined by staining B cells of various mice as shown in Fig. S3.

**Immunohistology of Thymus Sections.** Sections from OCT-embedded thymi were stained according to standard immunofluorescence protocol (dehydration, acetone fixation, immunostaining), and imaged on an Axiovert 200M inverted wide-field fluorescence microscope (Zeiss). Image processing was performed using ImageJ (NIH).

1. Thomas SY, et al. (2011) PLZF induces an intravascular surveillance program mediated by long-lived LFA-1-ICAM-1 interactions. *J Exp Med* 208(6):1179–1188.

2. Hayakawa K, et al. (2003) Positive selection of anti-thy-1 autoreactive B-1 cells and natural serum autoantibody production independent from bone marrow B cell development. *J Exp Med* 197(1):87–99.

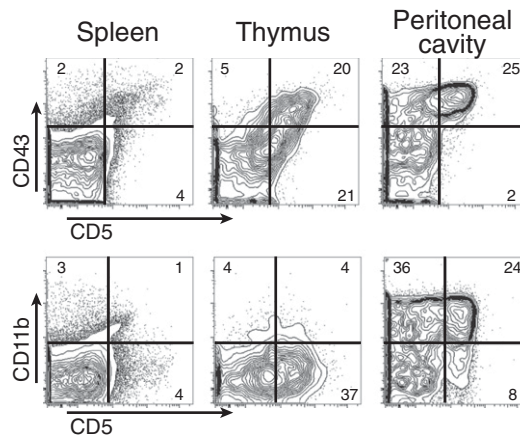

**Fig. S1.** Surface phenotype of thymic B cells vs. B1 B cells. Staining of splenic, thymic, and peritoneal cavity B cells for classical surface markers of the B1 B-cell lineage. Gated on CD19<sup>+</sup>B220<sup>+</sup> B cells.

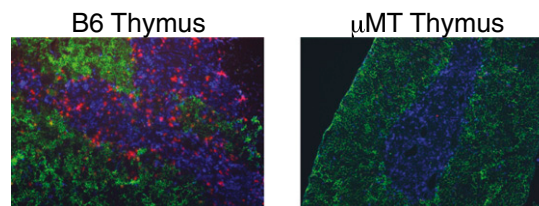

**Fig. S2.** Localization of thymic B cells. Representative thymic sections showing localization of thymic B cells in 6- to 8-wk-old B6 mice with  $\mu$ MT<sup>-/-</sup> mice as a negative control. Staining shows thymic cortex (CD19-Alexa 488) in green, thymic medulla (CD11c-Dylight 649) in blue, and thymic B cells (CD19-PE) in red. 10 $\times$  magnification.
